# Supplementary material
Source: ML conference proceedings conference paper supplement (https://proceedings.neurips.cc/paper_files/paper/2021/hash/cf77e1f8490495e9f8dedceaf372f969-Abstract.html)
Supplement: Supplementary file 1 [file cf77e1f8490495e9f8dedceaf372f969-Supplemental.pdf]

# Appendices for *PLUGIn: A simple algorithm for inverting generative models with recovery guarantees*

## A Some Results on Gaussian Matrices

Here we state some results on Gaussian Matrices, which will be used in the proofs later.

**Lemma 2** ([21, 22]). *Let  $\sigma : \mathbb{R} \rightarrow \mathbb{R}$  be a positively homogeneous activation function. Let  $A \in \mathbb{R}^{m \times n}$  have i.i.d.  $\mathcal{N}(0, \frac{1}{m})$  entries. Then for any  $x \in \mathbb{R}^n$ ,*

$$\mathbb{E}A^\top \sigma(Ax) = \lambda x,$$

where  $\lambda := \mathbb{E}g \cdot \sigma(g)$  with  $g \sim \mathcal{N}(0, 1)$ . In particular,  $\lambda = \frac{1}{2}$  when  $\sigma$  is ReLU.

*Proof.* Since  $\sigma$  is positively homogeneous, we can assume (without loss of generality)  $x \in \mathbb{S}^{n-1}$ . Denote by  $a_j^\top$  the  $j$ -th row of  $A$ . Then

$$\mathbb{E}A^\top \sigma(Ax) = \mathbb{E} \sum_{j=1}^m \sigma(a_j^\top x) a_j = m \mathbb{E} \sigma(a_1^\top x) a_1 = \mathbb{E} \sigma(a^\top x) a$$

where  $a := \sqrt{m}a_1 \sim \mathcal{N}(0, I_n)$ . Take an orthogonal matrix  $U$  such that  $Ux = \|x\|e_1 = e_1$  where  $e_1 = (1, 0, \dots, 0)^\top$ . Note that by rotation invariance for standard Gaussian,  $Ua$  and  $a$  have the same distribution  $\mathcal{N}(0, I_n)$ , thus

$$\mathbb{E} \sigma(a^\top x) a = \mathbb{E} \sigma(a^\top U^\top e_1) U^\top U a = \mathbb{E} \sigma(a^\top e_1) U^\top a = U^\top \mathbb{E} \sigma(a^\top e_1) a = \lambda U^\top e_1 = \lambda x.$$

□

The following theorem is the concentration of (Gaussian) measure inequality for Lipschitz functions. Here we only state a one-sided version, though it is more commonly stated with a two-sided one, i.e.,  $\mathbb{P}(|f(g) - \mathbb{E}f(g)| \geq t) \leq 2 \exp\left(-t^2/(2L_f^2)\right)$ .

**Theorem 2.** *Let  $f : \mathbb{R}^n \rightarrow \mathbb{R}$  be a Lipschitz function with Lipschitz constant  $L_f$ . Let  $g \in \mathbb{R}^n$  be a random vector with independent  $\mathcal{N}(0, 1)$  entries. Then, for all  $t > 0$ ,*

$$\mathbb{P}(f(g) - \mathbb{E}f(g) \geq t) \leq \exp\left(-\frac{t^2}{2L_f^2}\right).$$

A proof of Theorem 2 can be found in [30, Chap. 8]. Based on this theorem, it is easy to prove the following results.

**Lemma 3.** *Let  $A \in \mathbb{R}^{m \times n}$  have i.i.d.  $\mathcal{N}(0, 1)$  entries.*

(a) *For any fixed point  $s \in \mathbb{R}^n$ , we have*

$$\mathbb{P}\left(\|As\| \geq \sqrt{m}\|s\| + \sqrt{t}\|s\|\right) \leq e^{-t/2}, \quad \forall t > 0.$$

(b) *For any fixed  $k$ -dimensional subspace  $\mathcal{S} \subseteq \mathbb{R}^n$ , we have*

$$\mathbb{P}\left(\|A\|_{\mathcal{S}} \geq \sqrt{m} + \sqrt{k} + \sqrt{t}\right) \leq e^{-t/2}, \quad \forall t > 0.$$

*Proof.* (a) Without loss of generality, assume  $\|s\| = 1$ . Then  $As \sim \mathcal{N}(0, I_m)$  and by Jensen's inequality,  $\mathbb{E}\|As\| \leq \sqrt{\mathbb{E}\|As\|^2} = \sqrt{m}$ . The result follows immediately from Theorem 2 (with  $f(g) = \|g\|$  and  $g = As$ ).

(b) Let  $U$  be an orthogonal matrix such that  $U^\top \mathcal{S} = \text{span}\{e_1, \dots, e_k\} =: \mathcal{S}_0$ , then  $\|A\|_{\mathcal{S}} = \|AU\|_{\mathcal{S}_0}$ . Also, since  $AU$  has the same distribution as  $A$  (by rotation invariance), we get

$$\mathbb{P}\left(\|A\|_{\mathcal{S}} \geq \sqrt{m} + \sqrt{k} + \sqrt{t}\right) = \mathbb{P}\left(\|AU\|_{\mathcal{S}_0} \geq \sqrt{m} + \sqrt{k} + \sqrt{t}\right).$$

Notice that  $\|A\|_{\mathcal{S}_0}$  is the operator norm for a particular sub-matrix (obtained by taking first  $k$ -columns) of  $A$ , so without loss of generality, we can assume  $k = n$ .

Let  $f(A) = \|A\|$ . Since  $|f(A) - f(A')| \leq \|A - A'\|_F$ ,  $f$  is 1-Lipschitz when viewed as a mapping from  $\mathbb{R}^{mn}$  to  $\mathbb{R}$ . By Theorem 2

$$\mathbb{P}\left(f(A) \geq \mathbb{E}f(A) + \sqrt{t}\right) \leq e^{-t/2}, \quad \forall t > 0.$$

The result follows since  $\mathbb{E}\|A\| \leq \sqrt{m} + \sqrt{n}$  (see, e.g., [31] Section 7.3).  $\square$

## B Preliminaries and Proof for Lemma 1

### Preliminaries

For  $\alpha \geq 1$ , the  $\psi_\alpha$ -norm of a random variable  $X$  is defined as

$$\|X\|_{\psi_\alpha} := \inf\{t > 0 : \mathbb{E} \exp(|X|^\alpha/t^\alpha) \leq 2\}.$$

We say  $X$  is *sub-Gaussian* if  $\|X\|_{\psi_2} < \infty$  and *sub-exponential* if  $\|X\|_{\psi_1} < \infty$ . The  $\psi_2$  and  $\psi_1$  norms are also called sub-Gaussian and sub-exponential norms respectively. Loosely speaking, a sub-Gaussian (or a sub-exponential) random variable has tail dominated by the tail of a Gaussian (or an exponential) random variable.

For independent, mean zero, sub-exponential random variables  $X_1, \dots, X_m$ , their sum concentrates around zero. In particular, the following *Bernstein's Inequality* [31] Section 2.8] holds:

$$\mathbb{P}\left(\left|\sum_{i=1}^m X_i\right| \geq t\right) \leq 2 \exp\left[-c \min\left(\frac{t^2}{\sum_{i=1}^m \|X_i\|_{\psi_1}^2}, \frac{t}{\max_i \|X_i\|_{\psi_1}}\right)\right].$$

The above inequality also suggests that  $\sum_{i=1}^m X_i$  has a mixed tail, i.e., a tail consisting of both a sub-Gaussian part and a sub-exponential part. In our proof, we will use the following result from generic chaining for mixed tail processes.

**Theorem 3** (Theorem 3.5 [24]). *If  $(X_t)_{t \in T}$  has a mixed tail with respect to metric pair  $(d_1, d_2)$ , i.e.*

$$\mathbb{P}\left(|X_t - X_s| \geq \sqrt{u}d_2(t, s) + ud_1(t, s)\right) \leq 2e^{-u}, \quad \forall u \geq 0.$$

*Then there are constants  $c, C > 0$  such that for any  $u \geq 1$ ,*

$$\mathbb{P}\left(\sup_{t \in T} |X_t - X_{t_0}| \geq C(\gamma_2(T, d_2) + \gamma_1(T, d_1)) + c(\sqrt{u}\Delta_{d_2}(T) + u\Delta_{d_1}(T))\right) \leq e^{-u}.$$

*Here  $t_0$  is any fixed point in  $T$ ,  $\gamma_\alpha(T, d)$  is the  $\gamma_\alpha$ -functional and  $\Delta_{d_i}$  is the diameter given by  $\Delta_{d_i}(T) = \sup_{s, t \in T} d_i(s, t)$ .*

The  $\gamma_\alpha$ -functional of  $(T, d)$  is defined as

$$\gamma_\alpha(T, d) := \inf_{(T_n)} \sup_{t \in T} \sum_{n=0}^{\infty} 2^{n/\alpha} d(t, T_n), \quad (10)$$

where the infimum is taken with respect to all *admissible* sequences. A sequence  $(T_n)_{n \geq 0}$  of subsets of  $T$  is called *admissible* if  $|T_0| = 1$  and  $|T_n| \leq 2^{2^n}$  for all  $n \geq 1$ .

For our proof, we will use the following estimate on  $\gamma_\alpha(T, d)$ , which involves the generalized Dudley's integral [32] [24].

$$\gamma_\alpha(T, d) \leq C_{(\alpha)} \int_0^{\Delta_d(T)} (\log N(T, d, \varepsilon))^{1/\alpha} d\varepsilon, \quad (11)$$

where  $C_{(\alpha)}$  is a constant depending only on  $\alpha$  and  $N(T, d, \varepsilon)$  is the *covering number*, i.e., the smallest number of balls (in metric  $d$  and with radius  $\varepsilon$ ) needed to cover set  $T$ .

**Proof for Lemma 1**

We recall the statement of Lemma 1 below.

**Lemma 1.** *Let  $\sigma = \text{ReLU}$ . Fix  $w \in \mathbb{R}^n$  and let  $A \in \mathbb{R}^{m \times n}$  have i.i.d.  $\mathcal{N}(0, \frac{1}{m})$  entries. Define*

$$Z(u, v; w) := \langle Au, \sigma(Av) - \sigma(Aw) \rangle - \frac{1}{2} \langle u, v - w \rangle.$$

Suppose  $\mathcal{T}_1, \mathcal{T}_2$  are sets (not depending on  $A$ ) such that

$$\mathcal{T}_1 = \mathcal{S}_1 \cap \mathbb{B}^n(0, \alpha) \quad \text{and} \quad \mathcal{T}_2 = \mathcal{S}_2 \cap \mathbb{B}(w, \alpha r)$$

for some  $q$ -dimensional (affine) subspaces  $\mathcal{S}_1, \mathcal{S}_2 \subseteq \mathbb{R}^n$  and real numbers  $\alpha, r > 0$ . Then for any  $t \geq 1$ ,

$$\sup_{\substack{u \in \mathcal{T}_1 \\ v \in \mathcal{T}_2}} |Z(u, v; w)| \leq C_1 \alpha^2 r \left( \sqrt{\frac{q}{m}} + \frac{q}{m} + \sqrt{\frac{t}{m}} + \frac{t}{m} \right)$$

with probability at least  $1 - e^{-t}$ . Here  $C_1 > 0$  is an absolute constant.

*Proof.* First, we establish that  $Z(u, v; w)$  has a mixed tail.

Let  $a_i^\top$  be the  $i$ -th row of  $A$ , then  $a_i \sim \mathcal{N}(0, I_n/m)$ . For  $u \in \mathbb{B}^n(0, \alpha)$  and  $v \in \mathbb{B}(w, \alpha r)$ , define random variables

$$Z_{u,v}^i := \langle a_i, u \rangle [\sigma(\langle a_i, v \rangle) - \sigma(\langle a_i, w \rangle)] - \frac{1}{2m} \langle u, v - w \rangle, \quad i \in [m].$$

We have  $\mathbb{E}Z_{u,v}^i = 0$  by Lemma 2, and

$$Z_{u,v} := \sum_{i=1}^m Z_{u,v}^i = \langle Au, \sigma(Av) - \sigma(Aw) \rangle - \frac{1}{2} \langle u, v - w \rangle = Z(u, v; w).$$

For the increments of  $Z_{u,v}^i$ , we have

$$\begin{aligned} Z_{u,v}^i - Z_{u',v'}^i &= \langle a_i, u \rangle \sigma(a_i^\top v) - \frac{1}{2m} \langle u, v \rangle - \langle a_i, u' \rangle \sigma(a_i^\top v') + \frac{1}{2m} \langle u', v' \rangle \\ &\quad - \langle a_i, u - u' \rangle \sigma(a_i^\top w) + \frac{1}{2m} \langle u - u', w \rangle \\ &= \langle a_i, u \rangle \sigma(a_i^\top v) - \frac{1}{2m} \langle u, v \rangle - [\langle a_i, u \rangle \sigma(a_i^\top v') - \frac{1}{2m} \langle u, v' \rangle] \\ &\quad + [\langle a_i, u \rangle \sigma(a_i^\top v') - \frac{1}{2m} \langle u, v' \rangle] - \langle a_i, u' \rangle \sigma(a_i^\top v') + \frac{1}{2m} \langle u', v' \rangle \\ &\quad - \langle a_i, u - u' \rangle \sigma(a_i^\top w) + \frac{1}{2m} \langle u - u', w \rangle \\ &= \langle a_i, u \rangle [\sigma(a_i^\top v) - \sigma(a_i^\top v')] - \frac{1}{2m} \langle u, v - v' \rangle \\ &\quad + \langle a_i, u - u' \rangle [\sigma(a_i^\top v') - \sigma(a_i^\top w)] - \frac{1}{2m} \langle u - u', v' - w \rangle \end{aligned}$$

We can estimate its sub-exponential norm from Lemma 4 which gives

$$\begin{aligned} \|Z_{u,v}^i - Z_{u',v'}^i\|_{\psi_1} &\leq C_2 m^{-1} (\|u\| \|v - v'\| + \|u - u'\| \|v' - w\|) \\ &\leq C_2 \alpha m^{-1} (r \|u - u'\| + \|v - v'\|). \end{aligned}$$

By Bernstein's inequality,

$$\mathbb{P}(|Z_{u,v} - Z_{u',v'}| \geq t) \leq 2 \exp\left(-c \min\left(\frac{t^2}{d_2^2}, \frac{t}{d_1}\right)\right)$$

where the metrics  $d_i$  are given by

$$d_2^2 = \frac{\alpha^2}{m} (r \|u - u'\| + \|v - v'\|)^2 \quad \text{and} \quad d_1 = \frac{\alpha}{m} (r \|u - u'\| + \|v - v'\|).$$

Therefore  $(Z_{u,v})_{(u,v) \in \mathcal{T}}$  has a mixed tail with respect to the metric pair  $(Cd_1, Cd_2)$  for some absolute constant  $C$ .

Next, we bound the supremum of  $Z(u, v; w)$ . Without loss of generality, we will assume that  $q \geq 1$ . (In fact, if  $q = 0$ , then  $\mathcal{T}_1, \mathcal{T}_2$  are either empty set or singleton, in which case the result is trivial or follows directly from Bernstein's inequality).

Denote  $\mathcal{T} := \mathcal{T}_1 \times \mathcal{T}_2$  and define a metric  $d$  on  $\mathcal{T}$  as

$$d((u, v), (u', v')) := r\|u - u'\| + \|v - v'\|.$$

It is easy to see that  $d_2 = \frac{\alpha}{\sqrt{m}}d$  and  $d_1 = \frac{\alpha}{m}d$ . Also note that  $\gamma_i(\mathcal{T}, td) = t\gamma_i(\mathcal{T}, d)$  from definition (10). We can assume that  $\mathcal{S}_1$  is a subspace<sup>4</sup>, then  $Z_{0,v} = 0$  for  $v \in \mathcal{T}_2$ . Thus by Theorem 3 we have

$$\sup_{(u,v) \in \mathcal{T}} |Z_{u,v}| \lesssim \frac{\alpha}{\sqrt{m}}\gamma_2(\mathcal{T}, d) + \frac{\alpha}{m}\gamma_1(\mathcal{T}, d) + \sqrt{t}\frac{4\alpha^2 r}{\sqrt{m}} + t\frac{4\alpha^2 r}{m}$$

with probability at least  $1 - e^{-t}$ . It remains to estimate  $\gamma_i(\mathcal{T}, d)$ .

From (11) we have

$$\gamma_i(\mathcal{T}, d) \leq C_3 \int_0^{\Delta_d(\mathcal{T})} (\log N(\mathcal{T}, d, \varepsilon))^{1/i} d\varepsilon, \quad i = 1, 2.$$

Let  $d_{\ell_2}$  be the Euclidean metric. Note that one can always obtain a  $\varepsilon$ -covering on  $\mathcal{T}$  (with metric  $d$ ) from the product set of a  $\varepsilon/2$ -covering on  $\mathcal{T}_1$  (with metric  $rd_{\ell_2}$ ) and a  $\varepsilon/2$ -covering on  $\mathcal{T}_2$  (with metric  $d_{\ell_2}$ ). Moreover, note that  $\mathcal{T}_1$  is contained in a  $q$ -dimensional ball of radius  $\alpha$  and  $\mathcal{T}_2$  is contained in a  $q$ -dimensional ball of radius  $\alpha r$ . Hence

$$\begin{aligned} N(\mathcal{T}, d, \varepsilon) &\leq N(\mathcal{T}_1, rd_{\ell_2}, \varepsilon/2) \cdot N(\mathcal{T}_2, d_{\ell_2}, \varepsilon/2) \\ &\leq N(\alpha\mathbb{B}^q, rd_{\ell_2}, \varepsilon/2) \cdot N(\alpha r\mathbb{B}^q, d_{\ell_2}, \varepsilon/2) \\ &= N\left(\mathbb{B}^q, d_{\ell_2}, \frac{\varepsilon}{2\alpha r}\right) \cdot N\left(\mathbb{B}^q, d_{\ell_2}, \frac{\varepsilon}{2\alpha r}\right) \\ &\leq \left(1 + \frac{4\alpha r}{\varepsilon}\right)^{2q}. \end{aligned}$$

Here the last line uses estimate  $N(\mathbb{B}^q, d_{\ell_2}, \varepsilon) \leq (1 + \frac{2}{\varepsilon})^q$  for the covering number of unit balls (see e.g., [31] Section 4.2).

Note the estimate<sup>5</sup>  $\int_0^a \log\left(\frac{2a}{x}\right) dx = a(\log 2 + 1) < 2a$ , we get

$$\gamma_1(\mathcal{T}, d) \leq C_3 \int_0^{4\alpha r} 2q \log\left(1 + \frac{4\alpha r}{\varepsilon}\right) d\varepsilon \leq 2C_3 q \int_0^{4\alpha r} \log\left(\frac{8\alpha r}{\varepsilon}\right) d\varepsilon \leq 16C_3 \alpha r q.$$

Also note the inequality  $\sqrt{\log(1+x)} < \sqrt{2} \log(1+x)$  for  $x \geq 1$ , we have

$$\begin{aligned} \gamma_2(\mathcal{T}, d) &\leq C_3 \int_0^{4\alpha r} \sqrt{2q} \log^{\frac{1}{2}}\left(1 + \frac{4\alpha r}{\varepsilon}\right) d\varepsilon \\ &\leq 2C_3 \sqrt{q} \int_0^{4\alpha r} \log\left(1 + \frac{4\alpha r}{\varepsilon}\right) d\varepsilon \\ &\leq 2C_3 \sqrt{q} \int_0^{4\alpha r} \log\left(\frac{8\alpha r}{\varepsilon}\right) d\varepsilon \\ &\leq 16C_3 \alpha r \sqrt{q}. \end{aligned}$$

Therefore with probability at least  $1 - e^{-t}$ ,

$$\sup_{(u,v) \in \mathcal{T}} |Z_{u,v}| \leq C_1 \alpha^2 r \left( \sqrt{\frac{q}{m}} + \frac{q}{m} + \sqrt{\frac{t}{m}} + \frac{t}{m} \right).$$

□

<sup>4</sup>If  $\mathcal{S}_1$  is an affine subspace, let  $q' = q + 1$  and let  $\mathcal{S}'_1$  be the  $q'$ -dimensional subspace containing  $\mathcal{S}_1$  (and origin). One can proceed with  $\mathcal{S}'_1$  and  $q'$  for the proof. Finally, notice that  $\sqrt{\frac{q'}{m}} + \frac{q'}{m} \leq 2\left(\sqrt{\frac{q}{m}} + \frac{q}{m}\right)$ , so this will give the same result with only a different absolute constant. (In fact, in our application of Lemma 1 for the multi-layer proof,  $\mathcal{S}_1$  is chosen as  $\text{range}(A_i \cdots A_1)$ , which is always a subspace.)

<sup>5</sup>This comes from the indefinite integral  $\int \log\left(\frac{a}{x}\right) dx = x \log\left(\frac{a}{x}\right) + x + C$ .

**Lemma 4.** Let  $\sigma = \text{ReLU}$ . For  $u, x, y \in \mathbb{R}^n$  and  $g \sim \mathcal{N}(0, I_n)$ , the (mean zero) random variable

$$Z^g := \langle g, u \rangle [\sigma(g^\top x) - \sigma(g^\top y)] - \frac{1}{2} \langle u, x - y \rangle$$

has sub-exponential norm  $\|Z^g\|_{\psi_1} \leq C_2 \|u\| \|x - y\|$ , where  $C_2$  is an absolute constant.

*Proof.* It is easy to see that  $Z^g$  is mean zero from Lemma 2. Also from the following two properties of  $\psi_1, \psi_2$ -norms (see [31, Section 2.7]):

$$\|X - \mathbb{E}X\|_{\psi_1} \lesssim \|X\|_{\psi_1} \quad \text{and} \quad \|XY\|_{\psi_1} \leq \|X\|_{\psi_2} \|Y\|_{\psi_2},$$

we have (note that  $\sigma$  is 1-Lipschitz)

$$\|Z^g\|_{\psi_1} \lesssim \|\langle g, u \rangle\|_{\psi_2} \|\sigma(g^\top x) - \sigma(g^\top y)\|_{\psi_2} \lesssim \|\langle g, u \rangle\|_{\psi_2} \|\langle g, x - y \rangle\|_{\psi_2}.$$

The result follows by noting that  $\|\langle g, u \rangle\|_{\psi_2} = \|g_1\|_{\psi_2} \|u\|$  where  $g_1 \sim \mathcal{N}(0, 1)$ .  $\square$

## C Proof for Theorem 1

**Additional notations:** We use  $\mathbb{P}_{A_i}$  to denote that the probability is taken only with respect to  $A_i$ . In neural network  $\mathcal{G} : \mathbb{R}^{n_0} \rightarrow \mathbb{R}^{n_d}$ , let  $\mathcal{G}_i : \mathbb{R}^{n_0} \rightarrow \mathbb{R}^{n_i}$  be the mapping that corresponds to the first  $i$  layers, i.e.  $\mathcal{G}_i(x) = \sigma(A_i \dots \sigma(A_1 x) \dots)$ . For its weight matrices, let  $\tilde{A}_0 = I_{n_0}$  and  $\tilde{A}_i = A_i A_{i-1} \dots A_1$  for  $i \in [d]$ .

*Proof of Theorem 1* First we write

$$x^{k+1} - x^* = \theta \left( x^k - x^* - 2^d \tilde{A}_d^\top [\mathcal{G}(x^k) - y] \right) + (1 - \theta)(x^k - x^*).$$

For any fixed  $r > 0$ , using triangle inequality and Lemma 5 (with events  $\mathcal{E}_i$  defined as in Lemma 5) we can conclude that if  $\|x^k - x^*\| \leq r$ , then with probability at least  $1 - \mathbb{P}(\mathcal{E}_1) - \mathbb{P}(\mathcal{E}_2) - 2e^{-10n_0}$ ,

$$\|x^{k+1} - x^*\| \leq \frac{\theta}{2} \left( r + 30 \cdot 2^d \sqrt{\frac{n_0}{n_d}} \|\epsilon\| \right) + |1 - \theta|r = \alpha(r + \beta\epsilon) \quad (12)$$

where

$$\alpha = \frac{\theta}{2} + |1 - \theta|, \quad \beta = \frac{\theta/2}{|1 - \theta| + \theta/2}, \quad \epsilon = 30 \cdot 2^d \sqrt{n_0/n_d} \|\epsilon\|.$$

Now define a sequence  $\{r_k\}_{k \in \mathbb{N}}$  such that  $r_{k+1} = \alpha(r_k + \beta\epsilon)$  and  $r_0 = R$ . We can find its general formula as follow:

$$r_{k+1} - \frac{\alpha\beta}{1 - \alpha}\epsilon = \alpha \left( r_k - \frac{\alpha\beta}{1 - \alpha}\epsilon \right) \Rightarrow r_k = \alpha^k \left( R - \frac{\alpha\beta}{1 - \alpha}\epsilon \right) + \frac{\alpha\beta}{1 - \alpha}\epsilon.$$

Next, by induction on  $k$  (i.e., apply (12) with  $r = r_k$  for  $k = 0, 1, 2, \dots$ ) we get

$$\|x^k - x^*\| \leq r_k \leq \alpha^k R + \frac{\alpha\beta}{1 - \alpha}\epsilon, \quad k \in \mathbb{N}. \quad (13)$$

Notice that the events  $\mathcal{E}_1, \mathcal{E}_2$  remain unchanged throughout iterations, so (13) holds with probability at least  $1 - \mathbb{P}(\mathcal{E}_1) - \mathbb{P}(\mathcal{E}_2) - 2ke^{-10n_0}$ .

Lastly, from Lemma 6 and Lemma 8 we know  $\mathbb{P}(\mathcal{E}_i) \leq 3e^{-10n_0}$  and  $\|\mathcal{G}(x^k) - \mathcal{G}(x^*)\| \leq 3\|x^k - x^*\|$  on  $\mathcal{E}_2^c$ . This completes the proof.  $\square$

**Lemma 5.** Fix  $r > 0$  and assume assumptions A1-A4 hold. If  $\|x^k - x^*\| \leq r$ , then after one iteration according to (5) with step size  $\eta = 2^d$ , we have

$$\|x^{k+1} - x^*\| \leq \frac{1}{2} \left( r + 30 \cdot 2^d \sqrt{\frac{n_0}{n_d}} \|\epsilon\| \right)$$

with probability at least  $1 - \mathbb{P}(\mathcal{E}_1) - \mathbb{P}(\mathcal{E}_2) - 2e^{-10n_0}$ .

Here  $\mathcal{E}_1, \mathcal{E}_2$  are the events

$$\mathcal{E}_1 := \{\|\tilde{A}_d^\top \epsilon\| > 15\sqrt{n_0/n_d} \|\epsilon\|\} \quad \text{and} \quad \mathcal{E}_2 := \{\max(L_{\tilde{A}_i}, L_{\mathcal{G}_i}) > 3 \text{ for all } i \in [d]\}$$

where  $L_{\mathcal{G}_i}$  and  $L_{\tilde{A}_i}$  denote the Lipschitz constants of  $\mathcal{G}_i, \tilde{A}_i : \mathbb{R}^{n_0} \rightarrow \mathbb{R}^{n_i}$  respectively.

*Proof.* For  $x \in \mathbb{R}^{n_0}$ , denote  $x_0 = x$  and  $x_i = \mathcal{G}_i(x)$  for  $i \in [d]$ . Then

$$\begin{aligned} x^{k+1} - x^* &= x^k - x^* - 2^d \tilde{A}_d^\top [\mathcal{G}(x^k) - \mathcal{G}(x^*) - \epsilon] \\ &= (x_0^k - x_0^*) - 2\tilde{A}_1^\top (x_1^k - x_1^*) \\ &\quad + 2\tilde{A}_1^\top [(x_1^k - x_1^*) - 2A_2^\top (x_2^k - x_2^*)] \\ &\quad + \dots \\ &\quad + 2^{d-1} \tilde{A}_{d-1}^\top [(x_{d-1}^k - x_{d-1}^*) - 2A_d^\top (x_d^k - x_d^*)] \\ &\quad + 2^d \tilde{A}_d^\top \epsilon \end{aligned}$$

thus we can write

$$\begin{aligned} \|x^{k+1} - x^*\| &= \sup_{u \in \mathbb{S}^{n_0-1}} 2 \left( \langle A_1 u, x_1^k - x_1^* \rangle - \frac{1}{2} \langle u, x_0^k - x_0^* \rangle \right) \\ &\quad + 2^2 \left( \langle A_2 \tilde{A}_1 u, x_2^k - x_2^* \rangle - \frac{1}{2} \langle \tilde{A}_1 u, x_1^k - x_1^* \rangle \right) \\ &\quad + \dots \\ &\quad + 2^d \left( \langle A_d \tilde{A}_{d-1} u, x_d^k - x_d^* \rangle - \frac{1}{2} \langle \tilde{A}_{d-1} u, x_{d-1}^k - x_{d-1}^* \rangle \right) \\ &\quad - 2^d \langle u, \tilde{A}_d^\top \epsilon \rangle \\ &\leq 2^d \|\tilde{A}_d^\top \epsilon\| + \sum_{i=0}^{d-1} 2^{i+1} \sup_{u \in \mathbb{S}^{n_0-1}} Z_{i+1}(\tilde{A}_i u, x_i^k) \end{aligned}$$

where

$$Z_j(u, v) := \langle A_j u, \sigma(A_j v) - \sigma(A_j x_{j-1}^*) \rangle - \frac{1}{2} \langle u, v - x_{j-1}^* \rangle, \quad j \in [d].$$

On event  $\mathcal{E}_2^c$ ,  $\forall i \in [d-1]$  we have

$$\begin{aligned} \tilde{A}_i \mathbb{S}^{n_0-1} &\subseteq \text{range}(\tilde{A}_i) \cap \mathbb{B}^{n_i}(0, 3) =: \mathcal{T}_1^i, \\ x_i^k &\in \text{range}(\mathcal{G}_i) \cap \mathbb{B}(x_i^*, 3r) =: \mathcal{T}_2^i. \end{aligned}$$

By Lemma 7 there are  $N_{\mathcal{G}_i}$  many  $n_0$ -dimensional affine subspaces  $\{\mathcal{S}_{i,j}\}$  such that

$$\mathcal{T}_2^i \subseteq \cup_{j \in [N_{\mathcal{G}_i}]} \mathcal{T}_{2,j}^i \quad \text{where} \quad \mathcal{T}_{2,j}^i = \mathcal{S}_{i,j} \cap \mathbb{B}(x_i^*, 3r) \subseteq \mathbb{R}^{n_i} \quad \text{and} \quad N_{\mathcal{G}_i} \leq \Phi_i := \prod_{j=1}^i \left( \frac{en_j}{n_0} \right)^{n_0}.$$

For  $i \in [d-1]$ , apply Lemma 1 on  $\mathcal{T}_1^i \times \mathcal{T}_{2,j}^i$  followed by a union bound over  $j \in [N_{\mathcal{G}_i}]$ , we get

$$\sup_{\mathcal{T}_1^i \times \mathcal{T}_2^i} Z_{i+1}(u, v) \leq C_1(9r) \left( \sqrt{\frac{n_0}{n_{i+1}}} + \frac{n_0}{n_{i+1}} + \sqrt{\frac{t_{i+1}}{n_{i+1}}} + \frac{t_{i+1}}{n_{i+1}} \right)$$

with probability (over  $A_{i+1}$  and conditioning on  $\{A_j\}_{j \in [i]}$ ) at least  $1 - \Phi_i e^{-t_{i+1}}$ .

Choose  $t_{i+1} = 2 \log \Phi_i = 2n_0 \sum_{j=1}^i \log(\frac{en_j}{n_0})$ , then we get

$$\mathbb{P}_{A_{i+1}} \left( \sup_{\mathcal{T}_1^i \times \mathcal{T}_2^i} Z_{i+1}(u, v) \leq 9C_1 r \cdot 4 \sqrt{\frac{2 \log \Phi_i}{n_{i+1}}} \right) \geq 1 - e^{-\log \Phi_i}, \quad \forall i \in [d-1].$$

Also for  $i = 0$ , applying Lemma 1 on  $\mathbb{B}^{n_0}(0, 1) \times \mathbb{B}(x^*, r)$ , we get

$$\sup_{\substack{u \in \mathbb{B}^{n_0}(0,1) \\ v \in \mathbb{B}(x^*, r)}} Z_1(u, v) \leq C_1 r \cdot 4 \sqrt{\frac{10n_0}{n_1}}$$

with probability (over  $A_1$ ) at least  $1 - e^{-10n_0}$ .

Therefore under assumption A3 (with  $C_0 \geq 160 \cdot 72^2 C_1^2$ ), we have

$$\sum_{i=0}^{d-1} 2^{i+1} \sup_{u \in \mathbb{S}^{n_0-1}} Z_{i+1}(\tilde{A}_i u, x_i^k) \leq \frac{r}{72} + \sum_{i=1}^{d-1} 2^{i+1} \cdot \frac{r}{2} \sqrt{\frac{2}{160 \cdot 5^{i+1}}}$$

$$\begin{aligned}
&= \frac{r}{72} + \frac{r}{2} \cdot \frac{1}{10} \sum_{i=1}^{d-1} \left( \frac{2}{\sqrt{5}} \right)^i \\
&< \frac{r}{2} \cdot \frac{1}{10} \sum_{i=0}^{\infty} \left( \frac{2}{\sqrt{5}} \right)^i \\
&< \frac{r}{2}
\end{aligned}$$

with probability at least  $1 - \mathbb{P}(\mathcal{E}_2) - e^{-10n_0} - \sum_{i=1}^{d-1} e^{-\log \Phi_i}$ .

The result follows by noting that (assume  $C_0 \geq 160 \cdot 72^2$ )

$$\log \Phi_i = n_0 \sum_{j=1}^i \log \left( \frac{en_j}{n_0} \right) \geq n_0 i \log(eC_0) > 11n_0 i,$$

so  $\sum_{i \geq 1} e^{-\log \Phi_i} \leq \frac{e^{-11n_0}}{1 - e^{-11n_0}} < e^{-10n_0}$ . Also note that on  $\mathcal{E}_1^c$ ,

$$2^d \|\tilde{A}_d^\top \epsilon\| \leq 15 \cdot 2^d \sqrt{n_0/n_d} \|\epsilon\|.$$

□

**Lemma 6.** *Under assumptions A2-A4, we have*

$$\mathbb{P} \left( \|A_1^\top A_2^\top \cdots A_d^\top \epsilon\| \geq 15 \sqrt{\frac{n_0}{n_d}} \|\epsilon\| \right) \leq 3e^{-10n_0}.$$

*Proof.* Denote  $s_i := A_{i+1}^\top \cdots A_d^\top \epsilon$  for  $i \in [d-1]$  and  $s_d := \epsilon$ .

For  $i \in [d]$ , by Lemma 3(a) we have

$$\mathbb{P}_{A_i} (\sqrt{n_i} \|A_i^\top s_i\| \leq \sqrt{n_{i-1}} \|s_i\| + \sqrt{t_i} \|s_i\|) \geq 1 - e^{-t_i/2}, \quad \forall t_i > 0.$$

Choose  $t_1 = 20n_0$  and  $t_j = n_{j-1}/4^{j-1}$  for  $j > 1$ , we get

$$\begin{aligned}
\mathbb{P}_{A_1} \left( \|A_1^\top s_1\| \leq (1 + \sqrt{20}) \sqrt{\frac{n_0}{n_1}} \|s_1\| \right) &\geq 1 - e^{-10n_0}, \\
\mathbb{P}_{A_i} \left( \|A_i^\top s_i\| \leq (1 + 2^{-i+1}) \sqrt{\frac{n_{i-1}}{n_i}} \|s_i\| \right) &\geq 1 - e^{-n_{i-1}/4^i}, \quad i > 1.
\end{aligned}$$

Thus with probability at least  $1 - e^{-10n_0} - \sum_{i=2}^d e^{-n_{i-1}/4^i}$ ,

$$\begin{aligned}
\|A_1^\top A_2^\top \cdots A_d^\top \epsilon\| &\leq (1 + \sqrt{20}) \sqrt{\frac{n_0}{n_1}} \cdot \prod_{i=2}^d \left( 1 + \frac{1}{2^{i-1}} \right) \sqrt{\frac{n_{i-1}}{n_i}} \\
&\leq (1 + \sqrt{20}) \sqrt{\frac{n_0}{n_d}} \cdot \prod_{i=1}^{\infty} \left( 1 + \frac{1}{2^i} \right) \\
&< 15 \sqrt{n_0/n_d}
\end{aligned}$$

where the last inequality uses estimate 6  $\prod_{i=1}^{\infty} (1 + \frac{1}{2^i}) \leq e$  and  $(1 + \sqrt{20})e < 15$ .

It remains to show  $\sum_{i=2}^d e^{-n_{i-1}/4^i} \leq 2e^{-10n_0}$  for the desired probability bound. Note that by assumption A3 (assume  $C_0 \geq 40$ ),

$$\frac{n_i}{4^{i+1}} \geq \frac{1}{4} C_0 n_0 \sum_{j=0}^{i-1} \log \left( \frac{en_j}{n_0} \right) \geq 10n_0 i.$$

Hence

$$\sum_{i=2}^d e^{-n_{i-1}/4^i} \leq \sum_{i=2}^d e^{-10n_0(i-1)} < \sum_{i=1}^{\infty} e^{-10n_0 i} = \frac{e^{-10n_0}}{1 - e^{-10n_0}} < 2e^{-10n_0}.$$

□

<sup>6</sup>For  $\alpha > 0$ , estimate  $\sum_{j=1}^{\infty} \log(1 + \alpha 2^{-j}) \leq \sum_{j=1}^{\infty} \alpha 2^{-j} = \alpha$  holds, thus  $\prod_{j=1}^{\infty} (1 + \frac{\alpha}{2^j}) \leq e^\alpha$ .

With ReLU (or positively homogeneous) activation functions, the range of neural network (in each layer) is contained in a union of affine subspaces. The following lemma, which is based on ideas and results in [11], gives a precise statement of this.

**Lemma 7.** *Assume A1 and  $\min_{j \in [d]} \{n_j\} \geq n_0$ , then for  $i \in [d]$ ,  $\text{range}(\mathcal{G}_i)$  is contained in a union of affine subspaces. Precisely,*

$$\text{range}(\mathcal{G}_i) \subseteq \cup_{j \in [N_{\mathcal{G}_i}]} \mathcal{S}_{i,j} \quad \text{where} \quad N_{\mathcal{G}_i} \leq \prod_{j=1}^i \left( \frac{en_j}{n_0} \right)^{n_0}.$$

Here each  $\mathcal{S}_{i,j}$  is some  $n_0$ -dimensional affine subspace (which depends on  $\{A_l\}_{l \in [i]}$ ) in  $\mathbb{R}^{n_i}$ .

*Proof.* The theory on hyperplane arrangements [25, Chapter 6.1] tells us that  $n$  hyperplanes in  $\mathbb{R}^k$  (assume  $n \geq k$ ) partition the space  $\mathbb{R}^k$  into at most  $\sum_{j=0}^k \binom{n}{j}$  regions<sup>7</sup>.

Also for  $k \in [n]$ ,

$$\sum_{j=0}^k \binom{n}{j} \leq \sum_{j=0}^k \frac{n^j}{j!} \leq \sum_{j=0}^k \frac{k^j}{j!} \left( \frac{n}{k} \right)^j \leq \left( \frac{n}{k} \right)^k \sum_{j=0}^{\infty} \frac{k^j}{j!} = \left( \frac{en}{k} \right)^k.$$

So consider  $\text{range}(\mathcal{G}_1) = \{\sigma(A_1 x) : x \in \mathbb{R}^{n_0}\}$ . Denote by  $a_j^1$  ( $j \in [n_1]$ ) the rows of  $A_1$  and let  $H$  be the set of hyperplanes  $H := \cup_{j \in [n_1]} \{x : \langle a_j^1, x \rangle = 0\}$ . Then  $H$  partitions  $\mathbb{R}^{n_0}$  into at most  $(en_1/n_0)^{n_0}$  regions. Note that  $\sigma$  is linear in each of these regions (thus the mapping  $\mathcal{G}_1$  is linear in each region), so  $\text{range}(\mathcal{G}_1)$  is contained in at most  $(en_1/n_0)^{n_0}$  many  $n_0$ -dimensional (affine) subspace.

The result then follows by induction. □

The following lemma shows that the network  $\mathcal{G}$  in our model is Lipschitz with high probability. This may be an interesting result on its own.

**Lemma 8.** *For mappings  $\mathcal{G}_i, \tilde{A}_i : \mathbb{R}^{n_0} \rightarrow \mathbb{R}^{n_i}$ , let  $L_{\mathcal{G}_i}$  and  $L_{\tilde{A}_i}$  be their Lipschitz constants respectively. Under assumptions A1-A3, we have*

$$\mathbb{P}(\max\{L_{\tilde{A}_i}, L_{\mathcal{G}_i}\} \leq 3 \text{ for all } i \in [d]) \geq 1 - 3e^{-10n_0}.$$

*Proof.* Denote  $\tilde{\mathcal{R}}_0 = \mathcal{R}_0 = \mathbb{R}^{n_0}$  and

$$\mathcal{R}_j = \text{range}(\mathcal{G}_j) - \text{range}(\mathcal{G}_j), \quad \tilde{\mathcal{R}}_j = \mathcal{R}_j \cup \text{range}(\tilde{A}_j), \quad j \in [d].$$

Note that  $\tilde{A}_j$  is linear, so  $\text{range}(\tilde{A}_j)$  is a subspace in  $\mathbb{R}^{n_i}$  with dimension at most  $n_0$ .

Since  $\sigma$  is 1-Lipschitz, we have

$$\begin{aligned} \|\mathcal{G}_i(x) - \mathcal{G}_i(x')\| &= \|\sigma(A_i \mathcal{G}_{i-1}(x)) - \sigma(A_i \mathcal{G}_{i-1}(x'))\| \\ &\leq \|A_i (\mathcal{G}_{i-1}(x) - \mathcal{G}_{i-1}(x'))\| \\ &\leq \|A_i\|_{\mathcal{R}_{i-1}} \|\mathcal{G}_{i-1}(x) - \mathcal{G}_{i-1}(x')\|. \end{aligned}$$

Hence

$$\|\mathcal{G}_i(x) - \mathcal{G}_i(x')\| \leq \left( \prod_{l=1}^i \|A_l\|_{\tilde{\mathcal{R}}_{l-1}} \right) \|x - x'\|, \quad \forall i \in [d].$$

Similarly,

$$\|\tilde{A}_i x - \tilde{A}_i x'\| \leq \left( \prod_{l=1}^i \|A_l\|_{\tilde{\mathcal{R}}_{l-1}} \right) \|x - x'\|, \quad \forall i \in [d].$$

By Lemma 7,  $\text{range}(\mathcal{G}_i)$  is contained in a union of  $N_{\mathcal{G}_i}$  many  $n_0$ -dimensional affine subspaces, so  $\mathcal{R}_i$  is contained in a union of at most  $N_{\mathcal{G}_i}^2$  many  $2n_0$ -dimensional affine subspaces. Since every

<sup>7</sup>Such regions are also called  $k$ -faces or  $k$ -cells. Relative to each of the  $n$  hyperplanes, all points inside a region are on the same side.



$2n_0$ -dimensional affine subspaces in  $\mathbb{R}^{n_i}$  is also contained in a  $(2n_0 + 1)$ -dimensional subspace, we can further write this as

$$\tilde{\mathcal{R}}_i = \mathcal{R}_i \cup \text{range}(\tilde{A}_i) \subseteq \cup_{j \in [N_{\mathcal{G}_i}^2 + 1]} \mathcal{S}_{i,j} \quad \text{where} \quad N_{\mathcal{G}_i} \leq \Phi_i := \prod_{j=1}^i \left( \frac{en_j}{n_0} \right)^{n_0},$$

and each  $\mathcal{S}_{i,j}$  is a  $(2n_0 + 1)$ -dimensional subspace in  $\mathbb{R}^{n_i}$ .

Thus by Lemma 3(b) and union bound we have, for  $i \in [d - 1]$ ,

$$\mathbb{P}_{A_{i+1}} \left( \sqrt{n_{i+1}} \|A_{i+1}\|_{\tilde{\mathcal{R}}_i} \geq \sqrt{n_{i+1}} + \sqrt{2n_0 + 1} + \sqrt{t_i} \right) \leq (\Phi_i^2 + 1)e^{-t_i/2}, \quad \forall t_i > 0.$$

Choose  $t_i = 26 \log \Phi_i = 26n_0 \sum_{j=1}^i \log \left( \frac{en_j}{n_0} \right) > 2n_0 + 1$  we get

$$\mathbb{P}_{A_{i+1}} \left( \|A_{i+1}\|_{\tilde{\mathcal{R}}_i} \geq 1 + 2\sqrt{\frac{26 \log \Phi_i}{n_{i+1}}} \right) \leq e^{-10 \log \Phi_i}.$$

Under assumption A3 (with  $C_0 \geq 2^2 \cdot 26$ ), this implies

$$\mathbb{P}_{A_{i+1}} \left( \|A_{i+1}\|_{\tilde{\mathcal{R}}_i} \geq 1 + \frac{1}{2^{i+1}} \right) \leq e^{-10 \log \Phi_i}, \quad i \in [d - 1].$$

Also by Lemma 3(b) with  $t = 20n_0$  and assumption A3 (assume  $C_0 \geq 2^2 \cdot 26$ ), we have

$$\mathbb{P}_{A_1} \left( \|A_1\|_{\tilde{\mathcal{R}}_0} \geq 1 + \frac{1}{2} \right) \leq e^{-10n_0}.$$

Therefore with probability at least  $1 - e^{-10n_0} - \sum_{i=1}^{d-1} e^{-10 \log \Phi_i}$ ,

$$\forall i \in [d], \quad \prod_{l=1}^i \|A_l\|_{\tilde{\mathcal{R}}_{l-1}} \leq \prod_{l=1}^i \left( 1 + \frac{1}{2^l} \right) \leq \prod_{l=1}^{\infty} \left( 1 + \frac{1}{2^l} \right) < 3.$$

Finally, note that  $\log \Phi_i \geq in_0$ , so we have  $\sum_{i=1}^{d-1} e^{-10 \log \Phi_i} \leq \sum_{i=1}^{\infty} e^{-10n_0 i} < 2e^{-10n_0}$ . This completes the proof.  $\square$

## D An Example of $n_i$

Here we show if  $n_i = \beta C_0 5^d n_0 d(2d - i)$  where  $\beta$  is any fixed number such that  $\beta C_0 \in \mathbb{N}$  and  $\beta \geq 4 + \log C_0$ , then  $n_i$  satisfy (6).

In fact, note that  $2 \log d < d$  and  $\log(2\beta) < \beta$ , we have

$$\begin{aligned} \log \left( \prod_{j=0}^{i-1} \frac{en_j}{n_0} \right) &= 1 + \sum_{j=1}^{i-1} \log \left( \frac{en_j}{n_0} \right) \\ &\leq 1 + (d-1) \log(e\beta C_0 5^d \cdot 2d^2) \\ &= 1 + (d-1)[d \log 5 + 2 \log d + \log(eC_0)] + (d-1) \log(2\beta) \\ &< 1 + d(d-1)[\log 5 + 1 + \log(eC_0)] + (d-1)\beta \\ &\leq \beta + d(d-1)\beta + (d-1)\beta \\ &= \beta d^2. \end{aligned}$$

Since  $n_i \geq C_0 5^d n_0 (\beta d^2)$ , it is easy to see that  $n_i$  satisfy (6).

*Remark:* A similar argument as above can also show that  $n_i = \beta C_0 5^i n_0 i^2$  satisfy (6).

## E Code Link

Codes for numerical experiments are available at <https://github.com/babhrujoshi/PLUGIn>.

## F NeurIPS Paper Checklist

1. For all authors...
  - (a) Do the main claims made in the abstract and introduction accurately reflect the paper’s contributions and scope? [Yes]
  - (b) Did you describe the limitations of your work? [Yes] In Section 5
  - (c) Did you discuss any potential negative societal impacts of your work? [N/A] We are not aware of such impact.
  - (d) Have you read the ethics review guidelines and ensured that your paper conforms to them? [Yes]
2. If you are including theoretical results...
  - (a) Did you state the full set of assumptions of all theoretical results? [Yes]
  - (b) Did you include complete proofs of all theoretical results? [Yes] Proofs are included in appendices.
3. If you ran experiments...
  - (a) Did you include the code, data, and instructions needed to reproduce the main experimental results (either in the supplemental material or as a URL)? [Yes] See Appendix E.
  - (b) Did you specify all the training details (e.g., data splits, hyperparameters, how they were chosen)? [Yes] See Section 4
  - (c) Did you report error bars (e.g., with respect to the random seed after running experiments multiple times)? [Yes] See Section 4
  - (d) Did you include the total amount of compute and the type of resources used (e.g., type of GPUs, internal cluster, or cloud provider)? [Yes] We used Google Colaboratory to conduct the experiments included the paper, see Section 4
4. If you are using existing assets (e.g., code, data, models) or curating/releasing new assets...
  - (a) If your work uses existing assets, did you cite the creators? [Yes] We used MNIST dataset [29], which is cited in the paper.
  - (b) Did you mention the license of the assets? [N/A] MNIST dataset is made available under the terms of the Creative Commons Attribution-Share Alike 3.0 license.
  - (c) Did you include any new assets either in the supplemental material or as a URL? [N/A]
  - (d) Did you discuss whether and how consent was obtained from people whose data you’re using/curating? [N/A] MNIST dataset is made available under the terms of the Creative Commons Attribution-Share Alike 3.0 license.
  - (e) Did you discuss whether the data you are using/curating contains personally identifiable information or offensive content? [N/A]
5. If you used crowdsourcing or conducted research with human subjects...
  - (a) Did you include the full text of instructions given to participants and screenshots, if applicable? [N/A]
  - (b) Did you describe any potential participant risks, with links to Institutional Review Board (IRB) approvals, if applicable? [N/A]
  - (c) Did you include the estimated hourly wage paid to participants and the total amount spent on participant compensation? [N/A]
